# Supplementary material for: The unexpected effect of ferrocenyl substituents on the photochemistry of dianthryl sulfoxides
Source: Royal Society of Chemistry journal article supplement (doi:10.1039/d3cc04345b), 2023-01-01
Supplement: d3cc04345b1.pdf [file d3cc04345b1.pdf]

## Supplementary Information

# The Unexpected Effect of Ferrocenyl Substituents on the Photochemistry of Dianthryl Sulfoxides

Nicole Removski and Michael O. Wolf\*

*Department of Chemistry, 2036 Main Mall, University of British Columbia, Vancouver, BC, V6T 1Z1, Canada*

|                                                          |            |
|----------------------------------------------------------|------------|
| <b>Experimental Details .....</b>                        | <b>S2</b>  |
| General.....                                             | S2         |
| Spectroscopy, Spectrometry & Crystallography.....        | S2         |
| Electrochemistry .....                                   | S3         |
| <b>Synthetic Procedures .....</b>                        | <b>S3</b>  |
| Experimental Details.....                                | S3         |
| 9-Bromo-10-ferrocenylantracene.....                      | S3         |
| 1,1'-(Sulfinylbis(anthracene-10,9-diyl))diferrocene..... | S4         |
| <b>Structural Characterization.....</b>                  | <b>S5</b>  |
| Nuclear Magnetic Resonance.....                          | S5         |
| Mass Spectrometry.....                                   | S8         |
| Crystallography.....                                     | S21        |
| <b>Electrochemical Data.....</b>                         | <b>S25</b> |
| <b>Photochemical Data .....</b>                          | <b>S26</b> |
| <b>References .....</b>                                  | <b>S28</b> |

## Experimental Details

### General

Starting materials were purchased from Strem Chemicals, VDW International Co., Thermo Fisher Scientific Chemicals Inc., Alfa Aesar, Sigma Aldrich, or AmBeed, Inc, and used without further purification other than ferrocene, which was sublimed under vacuum onto a cold finger. Potassium *tert*-butoxide was purified by dissolving in THF in an oven-dried Schlenk flask, transferring the supernatant to another flask under N<sub>2</sub> and evacuating solvent under vacuum in the Schlenk line. Unless otherwise stated, all experiments were carried out under a nitrogen atmosphere using standard Schlenk line techniques. Degassed, purified, and dry tetrahydrofuran (THF) was freshly obtained in an oven-dried Schlenk bomb from an Innovative Technology Inc. solvent purification system (SPS) for each reaction. Unless otherwise stated, all solvents were obtained commercially from Sigma-Aldrich. Column chromatography was carried out using silica gel (SilicaFlash® F60, 230-400 mesh). The synthesis of 9-bromo-10-ferrocenylanthracene (**FcAnBr**) was adapted and optimized from the literature.

### Spectroscopy, Spectrometry & Crystallography

<sup>1</sup>H and <sup>13</sup>C NMR spectra were recorded in deuterated chloroform (CDCl<sub>3</sub>, CIL or AO) or deuterated dimethyl sulfoxide (DMSO-d<sub>6</sub>, CIL) on a Bruker Avance 400 Hz inverse probe, Bruker Avance 300 Hz with autosampler, or Bruker Avance 600 Hz spectrometer, referenced to the residual protonated solvent peak. All samples for photophysical measurements were diluted ten-fold in volumetric flasks and transferred in a dark fume hood to a quartz cuvette with a path length of one centimetre. A Cary 5000 UV-Vis-NIR spectrophotometer was used for all absorption measurements and an Agilent Cary Eclipse fluorescence spectrometer was used to carry out all emission measurements. For the absorption scans, the scan was swept from 800 nm to 200 nm at a scan rate of 600 nm/min. To convert sulfoxide compounds to the associated photoproducts, a UV flashlight (254 nm, Entella) was pulsed at the edge of the cuvette containing the sample in between scans. Electron paramagnetic resonance (EPR) spectra were taken on a Bruker ELEXSYS E560 spectrometer equipped with a X-band microwave source (7.0–10 GHz). Low- and high-resolution mass spectra were collected on a AccuTOF™ GCx Gas Chromatograph equipped with a field desorption (FD) ion source. Some high-resolution mass spectra were collected on a Waters Micromass LCT a time-of-flight mass spectrometer equipped with an atmospheric pressure chemical ionization (APCI) ion source. Crystals were recrystallised *via* slow vapour diffusion using hexane and DCM. Crystallographic properties were measured on a Bruker APEX-II CCD diffractometer at 296 K and the data was processed with the Bruker SAINT software package. Their structures were solved using the Olex2 software with the SHELXL solver and refined with the SHELXT refinement package.<sup>1</sup>

## Electrochemistry

The electrochemical properties of the prepared compounds were measured using cyclic voltammetry (CV) on a Metrohm Autolab PGSTAT12 potentiostat. CV measurements were carried out at room temperature in an airtight, 3-necked glass electrochemical cell, fitted with a 7 mm<sup>2</sup> glassy carbon working electrode, a platinum mesh counter electrode, and a silver wire reference electrode in a single compartment. The working electrode was polished with 1.0, 0.3 and 0.05  $\mu\text{M}$  alumina paste. Each electrode was rinsed with an aqueous 6 M HCl solution, water, and acetone, followed by gentle drying with a Kimwipe. A 0.124 M background electrolyte solution was prepared with triply recrystallized tetrabutylammonium tetrafluorophosphate (TBAPF<sub>6</sub>) in dry, degassed dichloromethane (CH<sub>2</sub>Cl<sub>2</sub>) from the SPS and was used as the solvent for all CV experiments. The compound of interest was added to the electrolyte at a concentration of 0.61 mM. The scan rate applied was 100 mVs<sup>-1</sup> and the current was set at 10  $\mu\text{A}$ . Measurements taken were compared against ferrocene as an external standard after the measurements, run under identical conditions.

## Synthetic Procedures

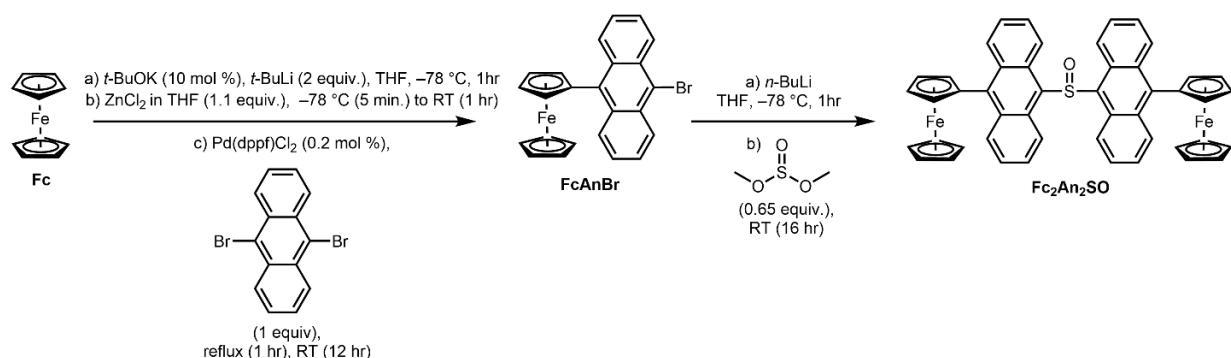

**Scheme S1.** Synthetic pathway to **Fc<sub>2</sub>An<sub>2</sub>SO**

## Experimental Details

**9-Bromo-10-ferrocenylantracene.** Ferrocene (500 mg, 2.7 mmol, 1 equiv.) and potassium *tert*-butoxide (30 mg, 0.27 mmol, 0.1 equiv.) were purified and dried, then loaded into an oven-dried, 250 mL Schlenk flask equipped with a stir bar in a glovebox. Dry THF (20 mL) from the SPS was added *via* syringe transfer and the solution was cooled to -78 °C. Maintaining -78 °C, *tert*-butyl lithium (3.36 mL, 1.6 M in pentane, 5.4 mmol, 2 equiv.) was added dropwise, then stirred for 1 h. A zinc chloride solution in THF (2.7 mL, 1 M, 1.1 equiv.) was prepared in the glovebox and transferred into the reaction flask at -78 °C. After five minutes, the reaction flask was warmed to room temperature and stirred for 1 hour. The cap of the reaction flask was removed; 9,10-dibromoanthracene (903 mg, 2.7 mmol, 1 equiv.) and [1,1'-bis(diphenylphosphino)ferrocene]palladium(II) dichloride ([dppf]PdCl<sub>2</sub>), 4 mg, 0.2 mol%) were

quickly added. The flask was equipped with a condenser, heated at reflux for 1 hour, then stirred overnight. The reaction was quenched with water (20 mL), extracted with DCM, dried over MgSO<sub>4</sub>, and concentrated under vacuum. The crude material was dry loaded onto a silica gel column and eluted with 100% hexanes which recovered the starting material (AnBr<sub>2</sub>) and the intended cross-coupled product (269 mg, 29 %) as a waxy bright red solid. *R*<sub>f</sub> = 0.4 (hexanes). Note: If the product is left under vacuum, under air and/or exposed to light for more than 24 h, photooxidation is observed. It is recommended that this compound be kept in the dark under an inert atmosphere or used immediately to avoid this. <sup>1</sup>H NMR (400 MHz, CDCl<sub>3</sub>): δ 4.26 (s, 5H), δ 4.63 (pseudo t, 2H), δ 4.80 (pseudo t, 2H), δ 7.48 (m, 2H), δ 7.57 (m, 2H), δ 8.59 (d, 2H), δ 9.14 (d, 2H). <sup>13</sup>C{<sup>1</sup>H} NMR (600 MHz, CDCl<sub>3</sub>): δ 67.98, δ 69.95, δ 73.66, δ 84.08, δ 124.33, δ 126.74, δ 127.95, δ 128.21, δ 130.43, δ 131.55, δ 133.15. HR-FD MS: *m/z* calc'd for <sup>12</sup>C<sub>24</sub><sup>1</sup>H<sub>17</sub><sup>79</sup>Br<sup>56</sup>Fe: 439.98630; Found: 439.98626 [M]<sup>+</sup>.<sup>3</sup>

**1,1'-(Sulfinylbis(anthracene-10,9-diyl))diferrocene.** In an oven-dried 25 mL Schlenk flask, dried 9-bromo-10-ferrocenylanthracene (150 mg, 0.34 mmol, 1.0 equiv.) that was previously dried under rotary evaporation and stored under N<sub>2</sub> was dissolved in dry THF (10 mL) and cooled to −78 °C in an acetone/dry ice bath. Maintaining −78 °C, *n*-butyllithium (0.26 mL, 1.6 M in hexanes, 0.40 mmol, 1.2 equiv.) was syringed into the reaction flask dropwise and stirred for 1 h. After turning off all fumehood lights and wrapping the flask with aluminum foil, positive N<sub>2</sub> pressure was applied, and the septum was removed. Dimethyl sulfite (17. μL, 0.20 mmol, 0.6 equiv.) was immediately added with a micropipette and the reaction was capped and warmed to room temperature, stirring overnight. The crude material was loaded onto a silica gel plug neat and eluted with 100% hexanes, 50/50 hexanes/DCM, then 100% DCM. The solvent was removed *in vacuo* and the product was recovered as a dark red solid (106 mg, 40%). <sup>1</sup>H NMR (400 MHz, CDCl<sub>3</sub>): δ 4.11 (s, 5H), δ 4.55 (pseudo t, 2H), δ 4.67 (pseudo t, 2H), δ 7.36 (m, 4H), δ 9.08 (d, *J* = 8.68 Hz, 2H), δ 9.27 (d, 2H). <sup>13</sup>C{<sup>1</sup>H} NMR (600 MHz, CDCl<sub>3</sub>): δ 68.35, δ 69.95, δ 73.66, δ 84.08, δ 124.33, δ 126.74, δ 127.95, δ 128.21, δ 130.43, δ 131.55, δ 133.15. FD-HRMS: *m/z* calc'd for <sup>12</sup>C<sub>48</sub><sup>1</sup>H<sub>34</sub><sup>56</sup>Fe<sub>2</sub><sup>16</sup>O<sup>32</sup>S: 770.10292; Found: 770.10204 [M]<sup>+</sup>.

## Structural Characterization

### Nuclear Magnetic Resonance

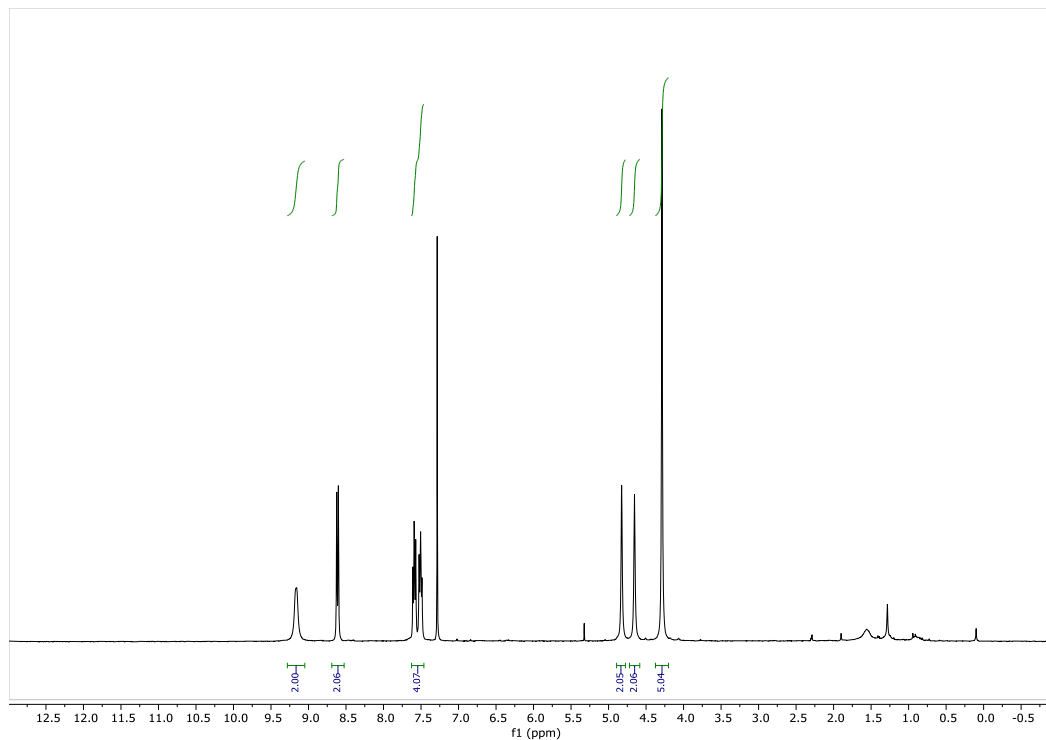

**Figure S1.** <sup>1</sup>H NMR spectrum of **FcAnBr** (CDCl<sub>3</sub>, 400 MHz, 25 °C).

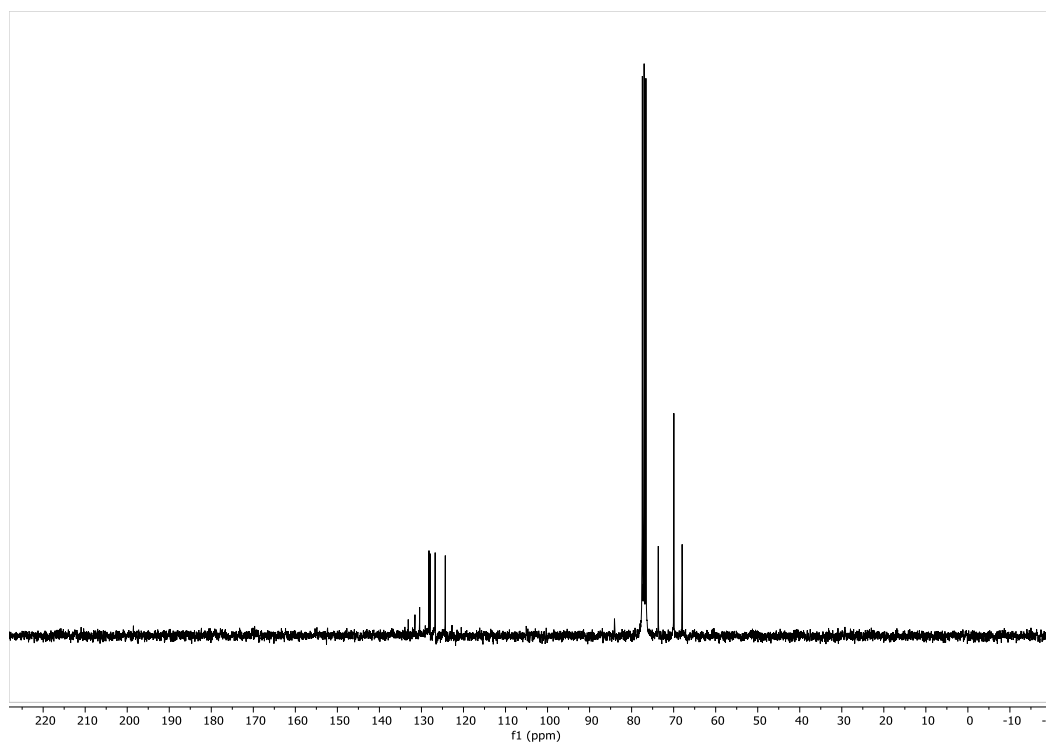

**Figure S2.** <sup>13</sup>C NMR spectrum of **FcAnBr** (CDCl<sub>3</sub>, 600 MHz, 25 °C).

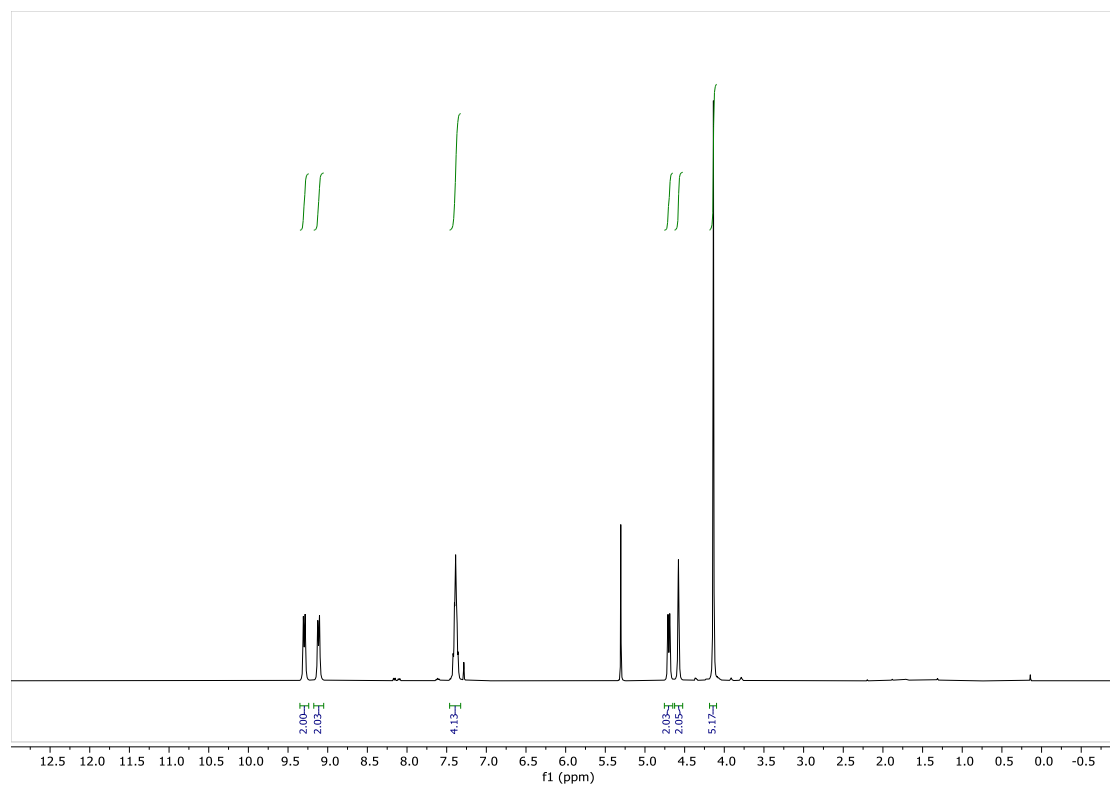

**Figure S3.** <sup>1</sup>H NMR spectrum of **Fc<sub>2</sub>An<sub>2</sub>SO** (CDCl<sub>3</sub>, 400 MHz, 25 °C).

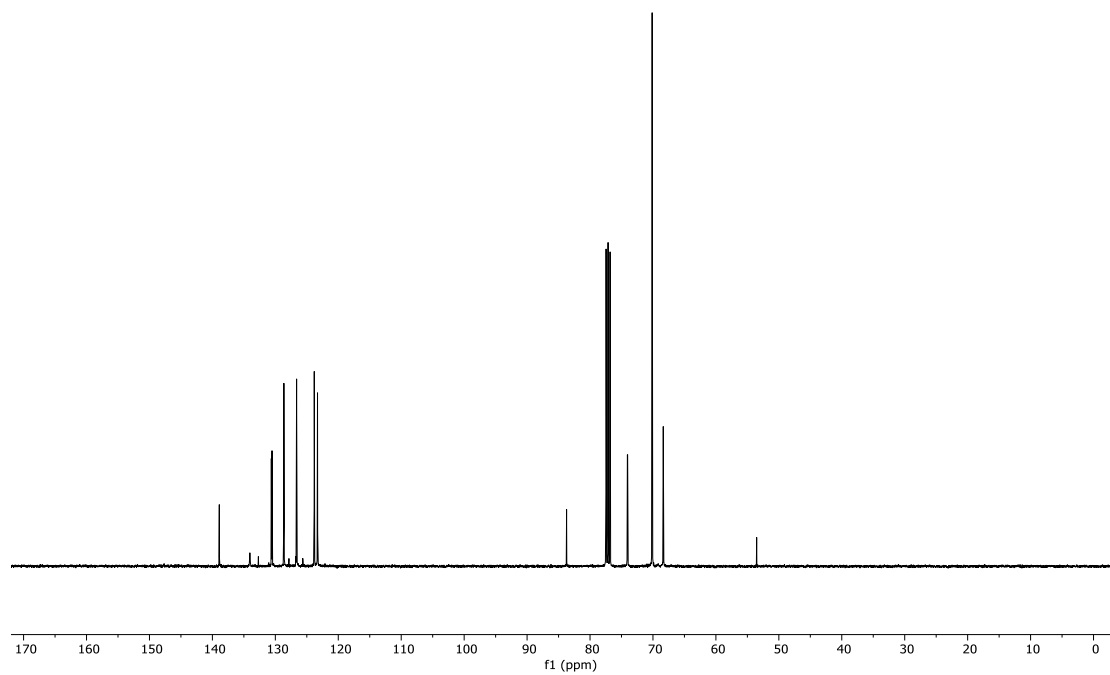

**Figure S4.** <sup>13</sup>C NMR spectrum of **Fc<sub>2</sub>An<sub>2</sub>SO** (CDCl<sub>3</sub>, 600 MHz, 25 °C).

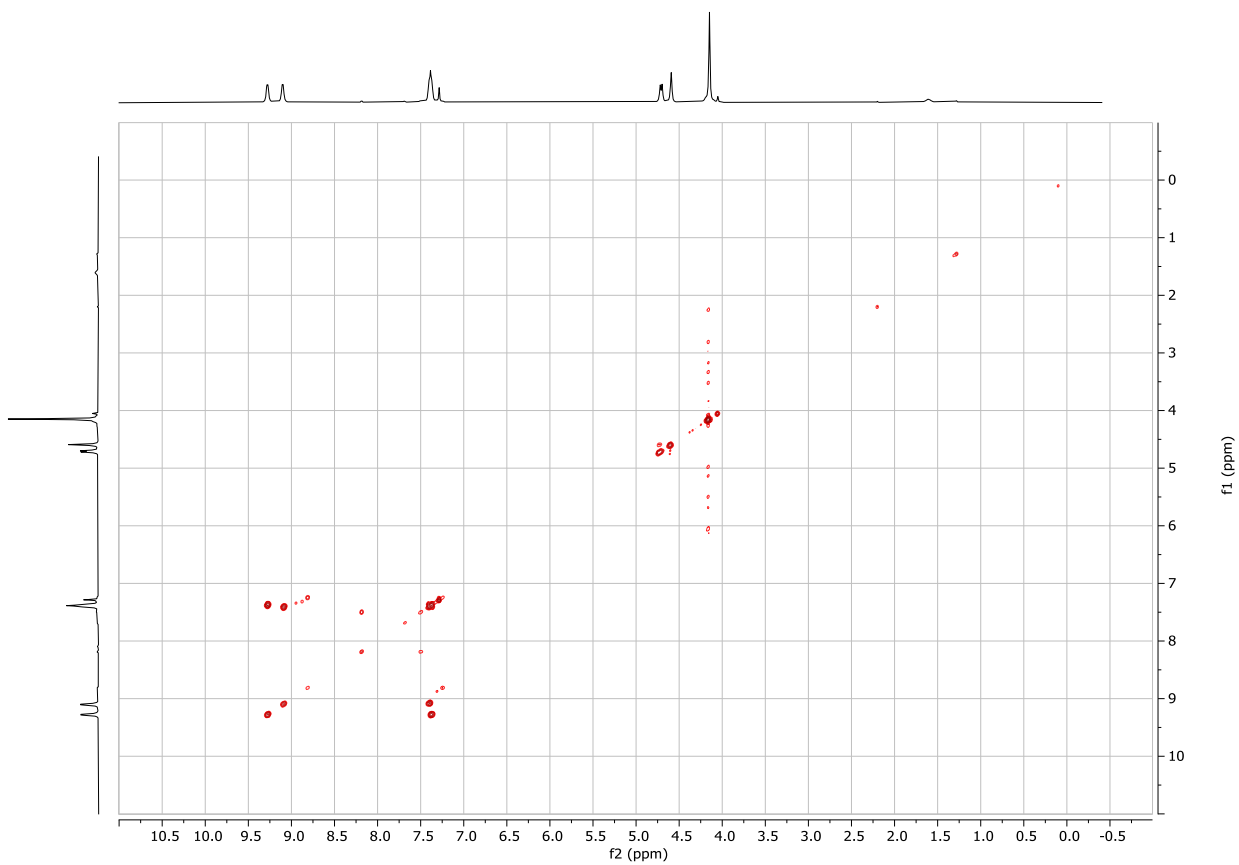

**Figure S5.** 2D COSY NMR spectrum of **Fc<sub>2</sub>An<sub>2</sub>SO** (CDCl<sub>3</sub>, 600 MHz, 25 °C).

## Mass Spectrometry

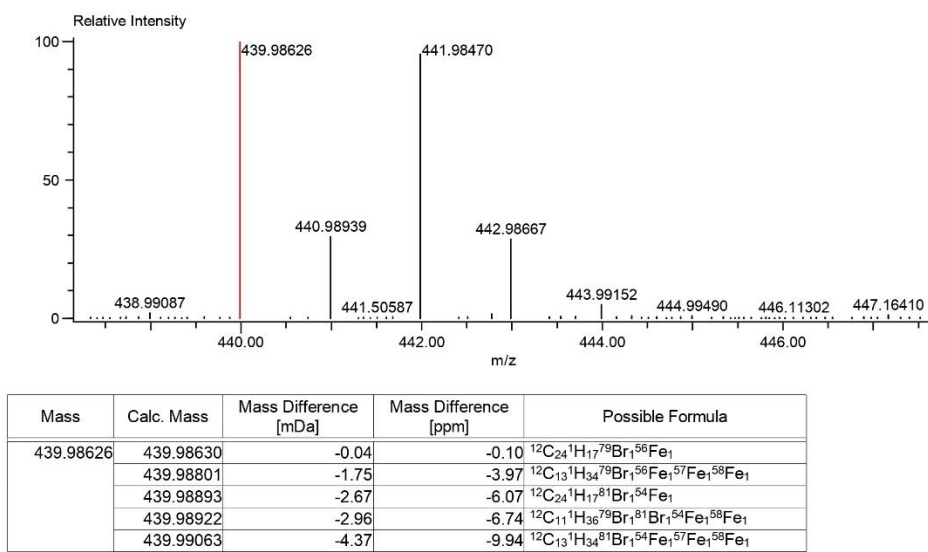

**Figure S6.** High Resolution FD-MS spectrum of **FcAnBr**.

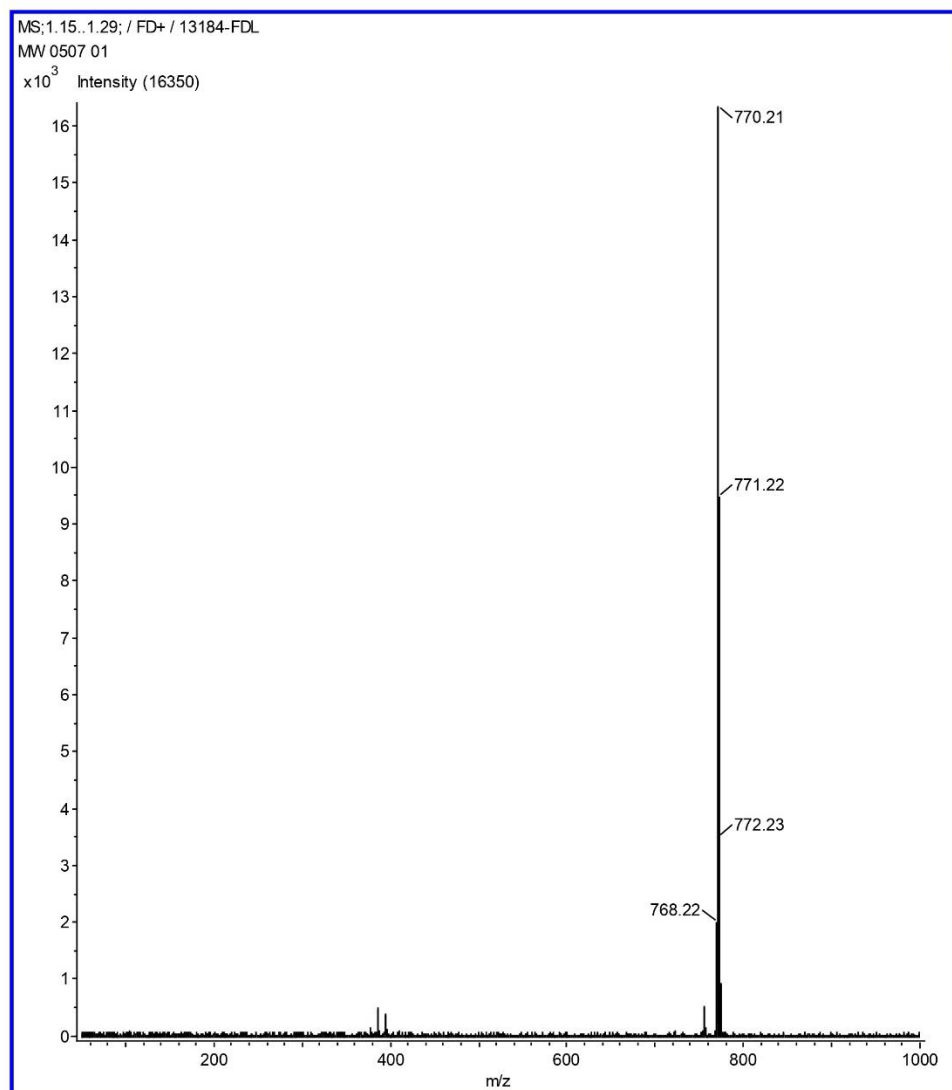

**Figure S7.** Low-resolution FD-MS spectra of **Fc<sub>2</sub>An<sub>2</sub>SO**.

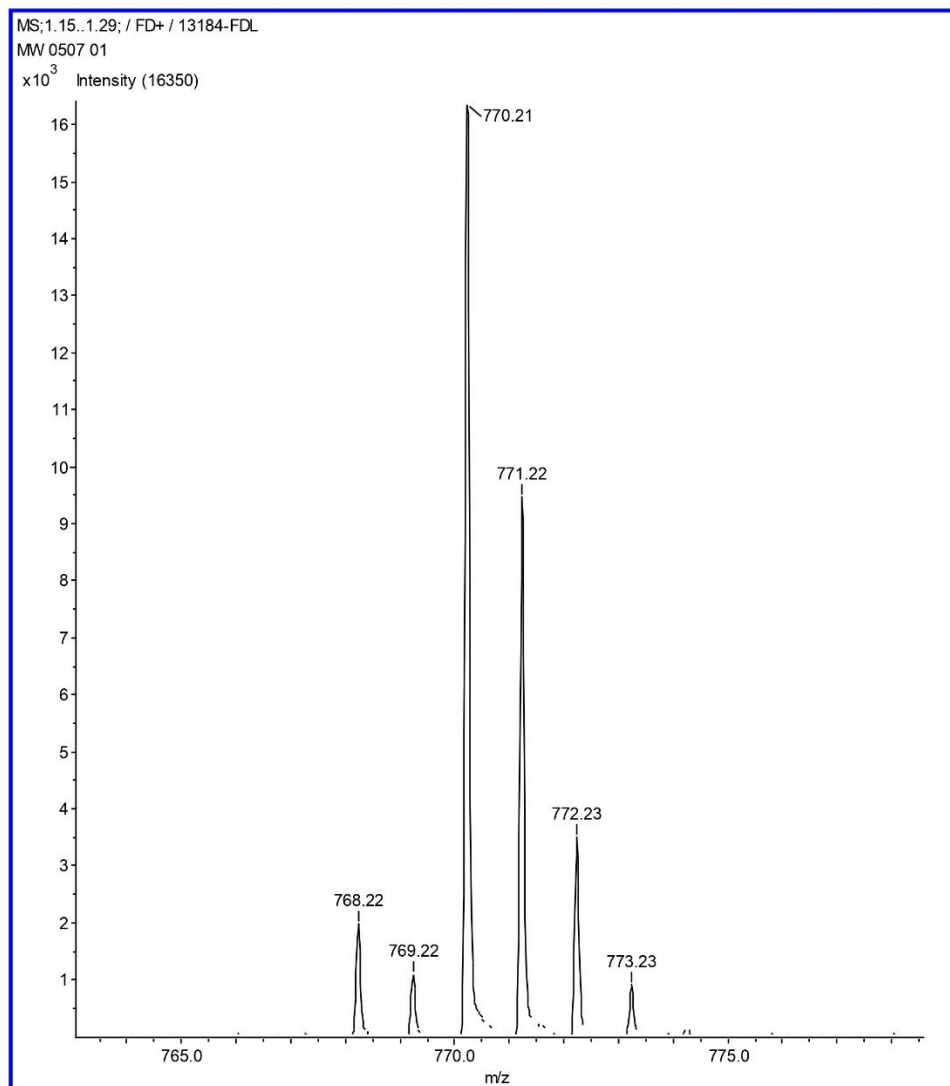

**Figure S8.** Low-resolution FD-MS spectra of **Fc<sub>2</sub>An<sub>2</sub>SO** (range from m/z = 765 to 775 shown).

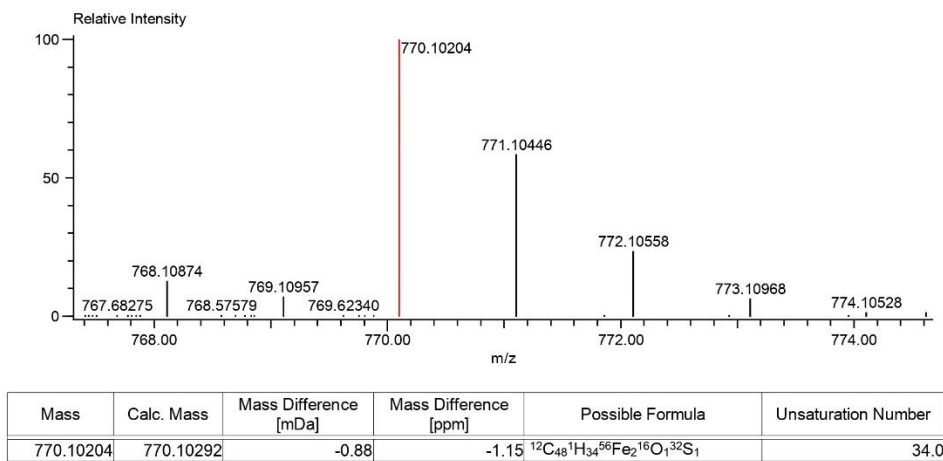

**Figure S9.** High-resolution FD-MS spectra of **Fc<sub>2</sub>An<sub>2</sub>SO**.

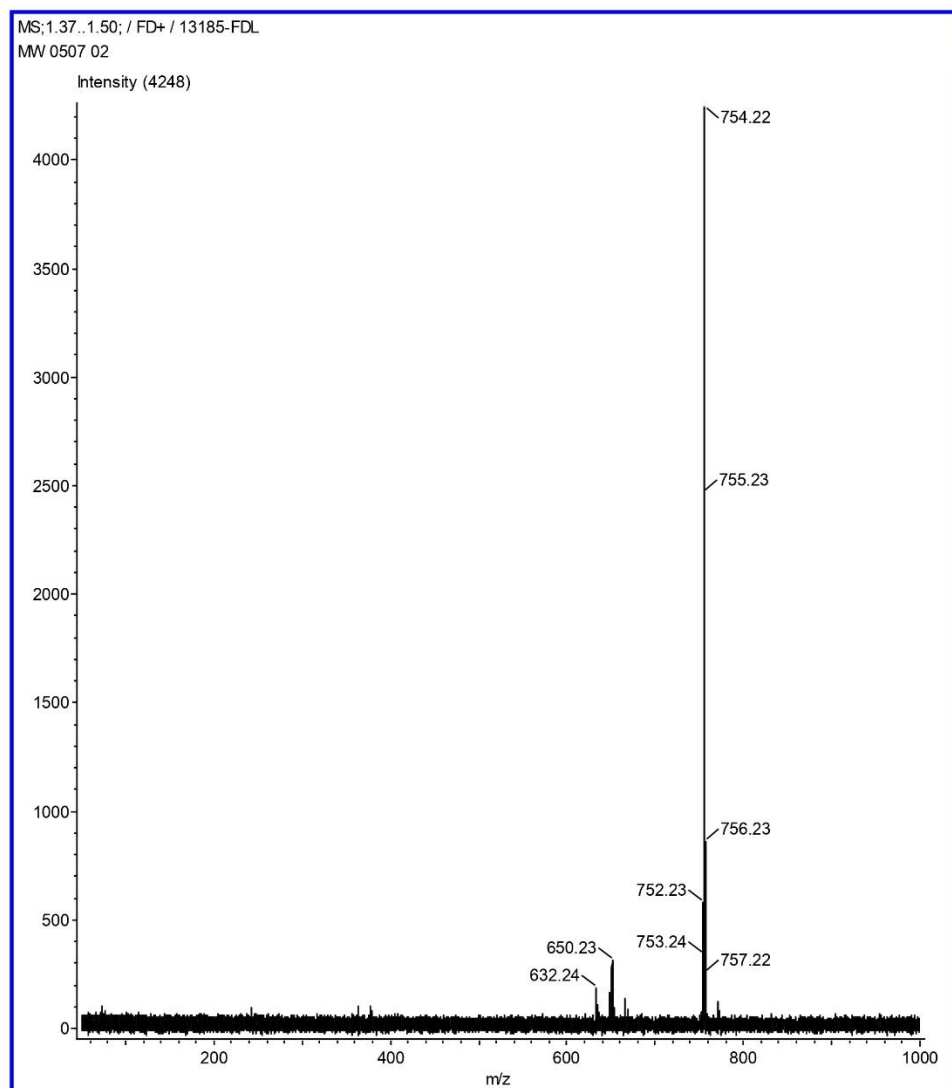

**Figure S10.** Low-resolution FD-MS spectra of irradiated **Fc<sub>2</sub>An<sub>2</sub>SO**.

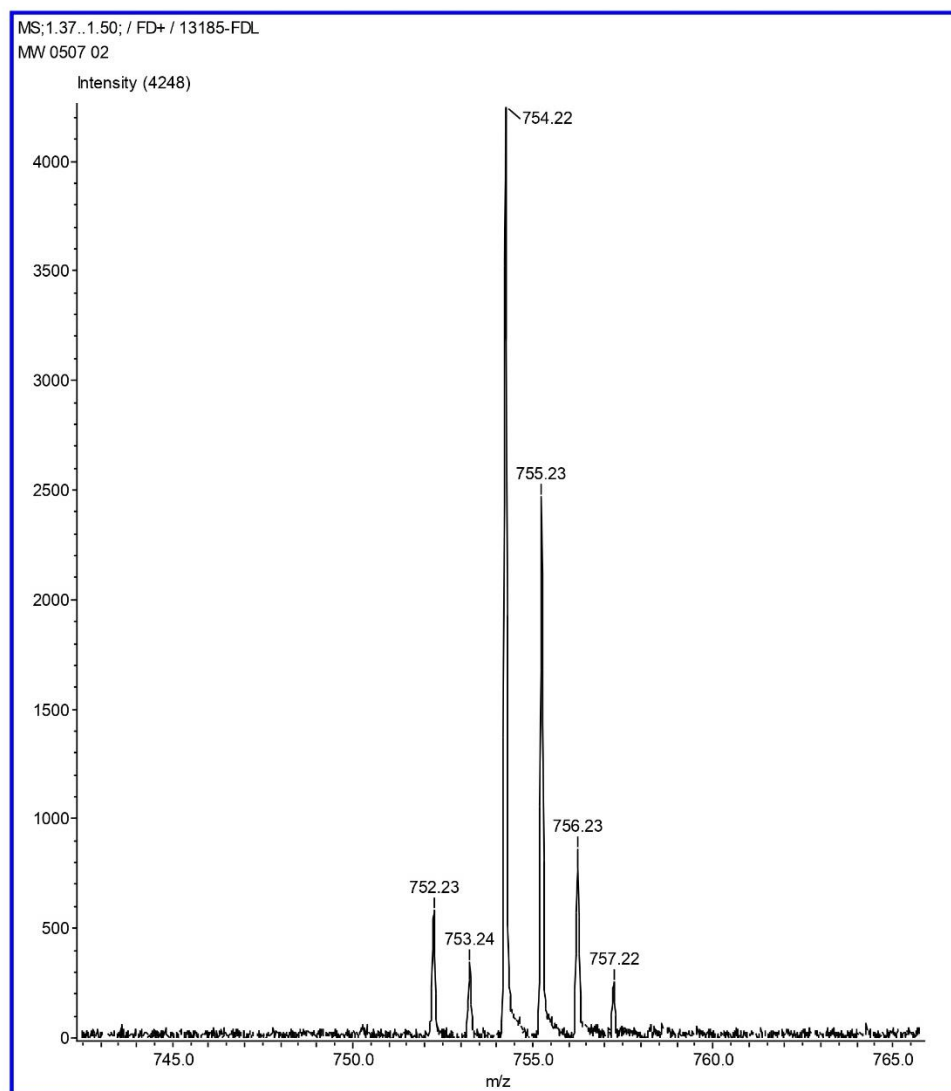

**Figure S11.** Low-resolution FD-MS spectra of irradiated **Fc<sub>2</sub>An<sub>2</sub>SO** (range from  $m/z = 745$  to  $765$  shown).

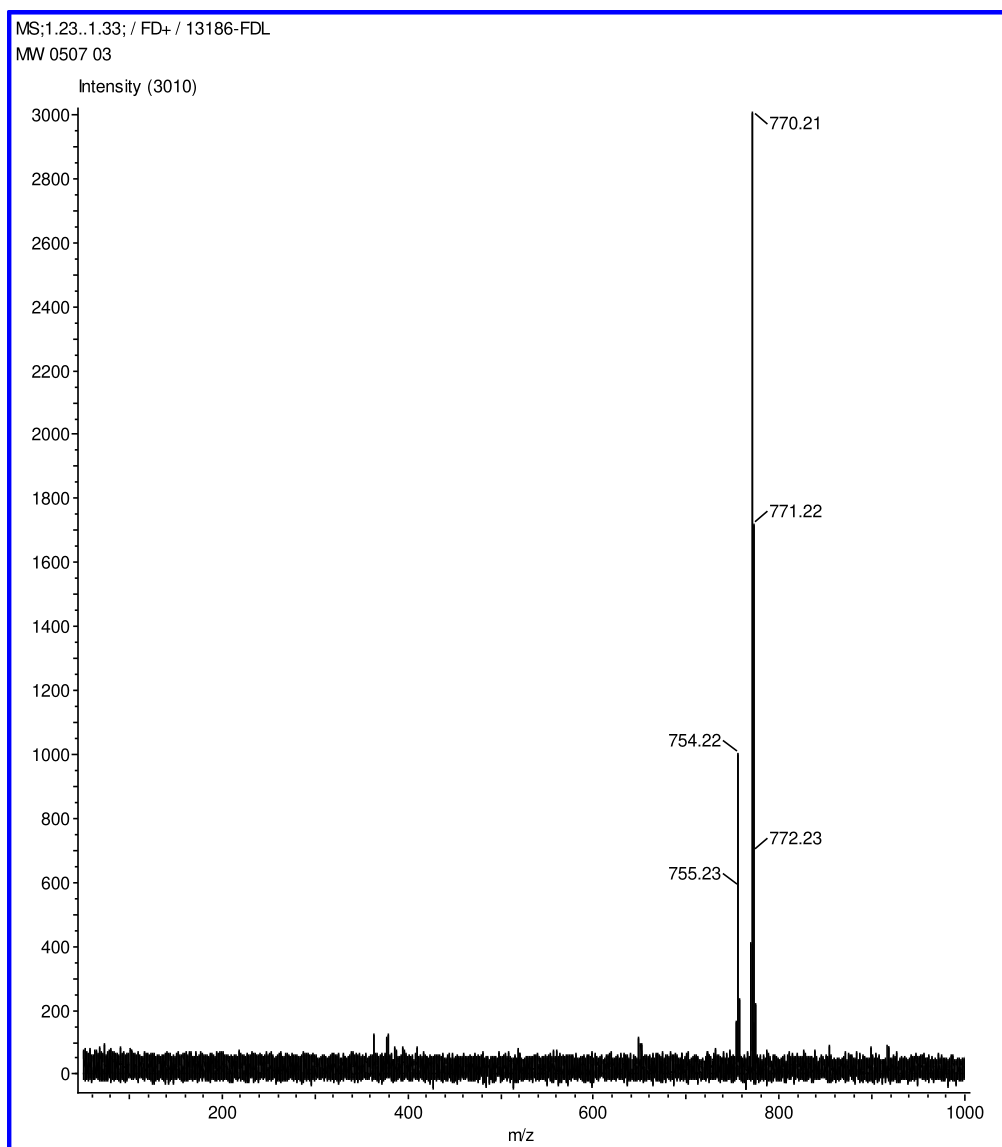

**Figure S12.** Low-resolution FD-MS spectra of chemically oxidized **Fc<sub>2</sub>An<sub>2</sub>SO**.

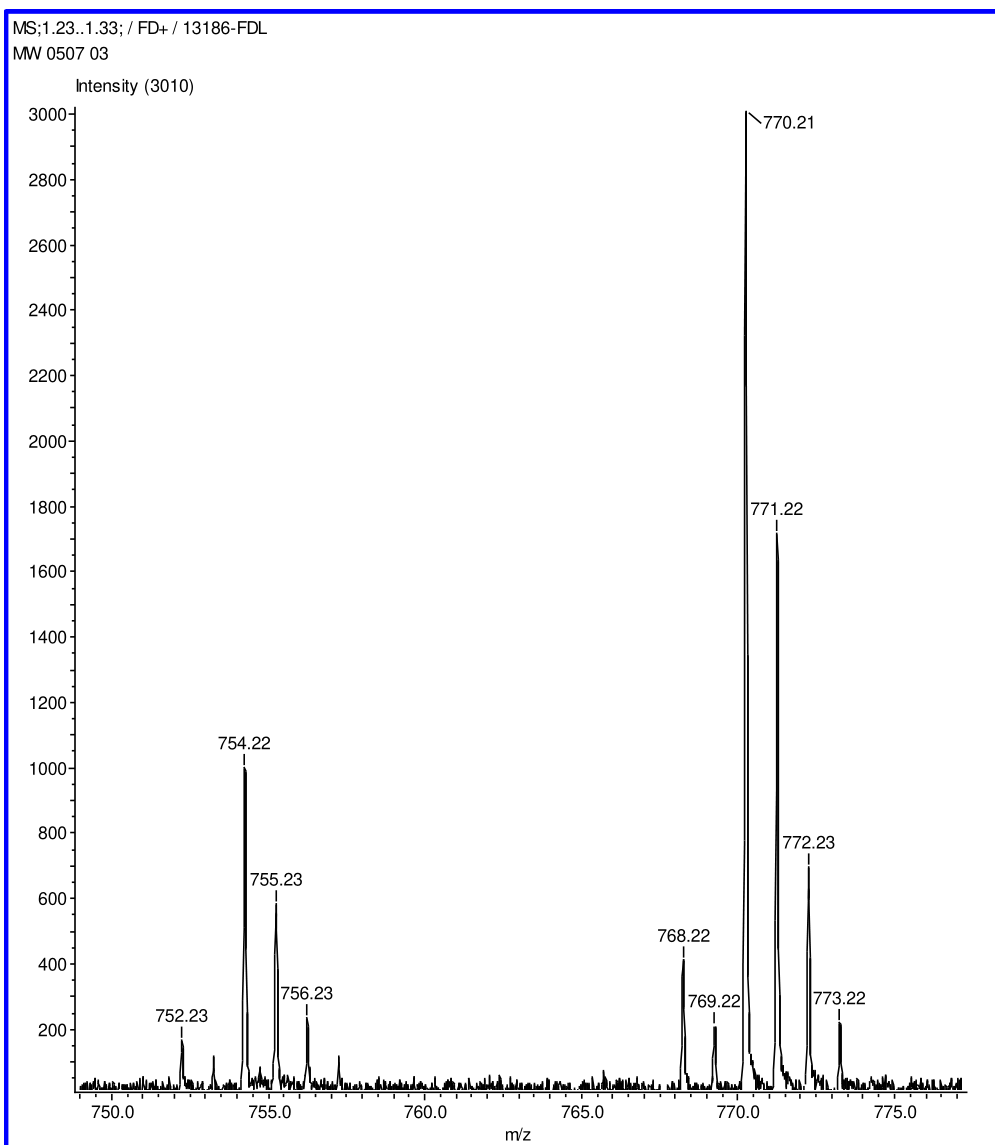

**Figure S13.** Low-resolution FD-MS spectra of chemically oxidized **Fc<sub>2</sub>An<sub>2</sub>SO** (range from  $m/z = 750$  to 775 shown).

## Chromatograms

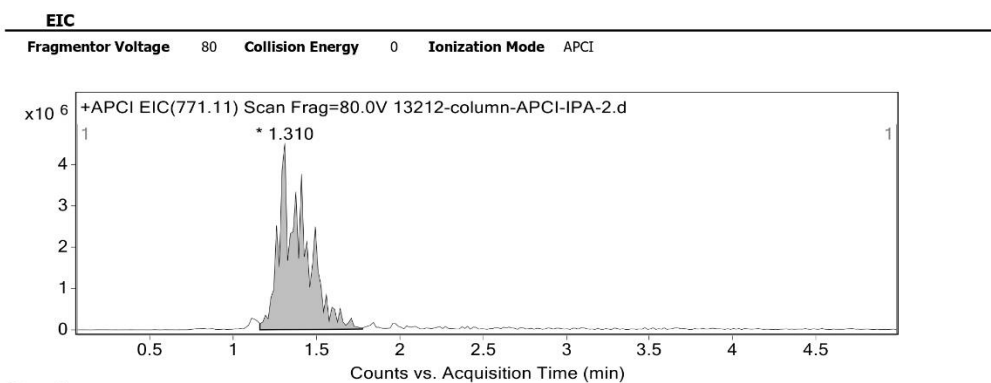

## Spectra

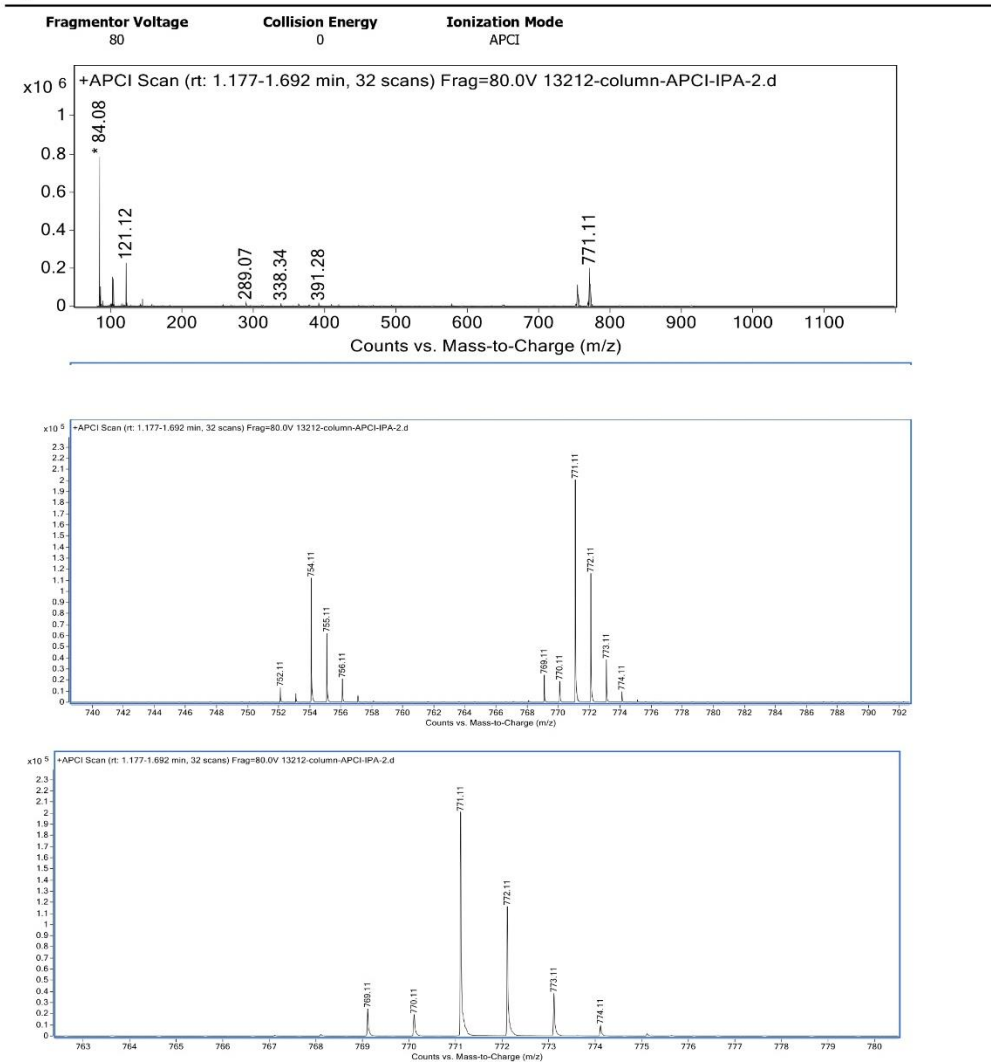

**Figure S14.** High-resolution APCI-MS spectra of chemically oxidized  $\text{Fc}_2\text{An}_2\text{SO}$ .

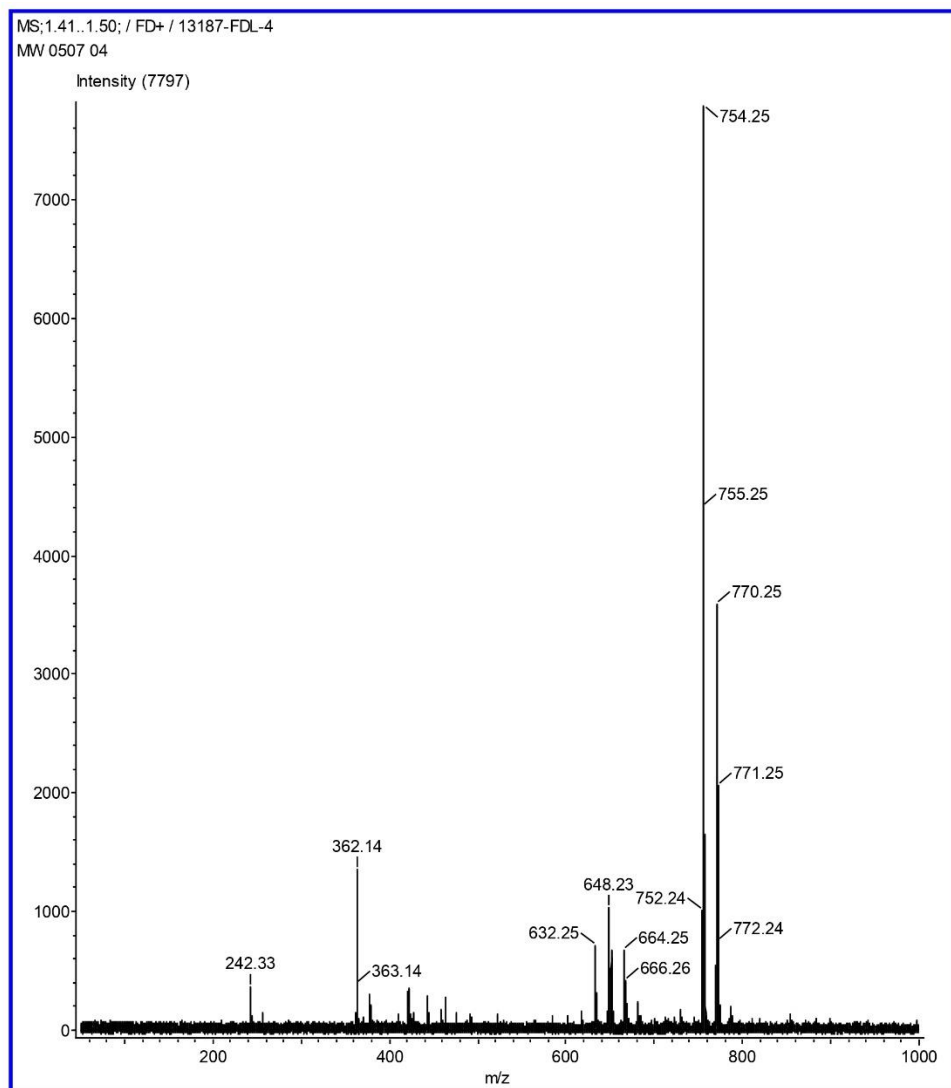

**Figure S15.** Low-resolution FD-MS spectra of chemically oxidized and irradiated  $\text{Fc}_2\text{An}_2\text{SO}$ .

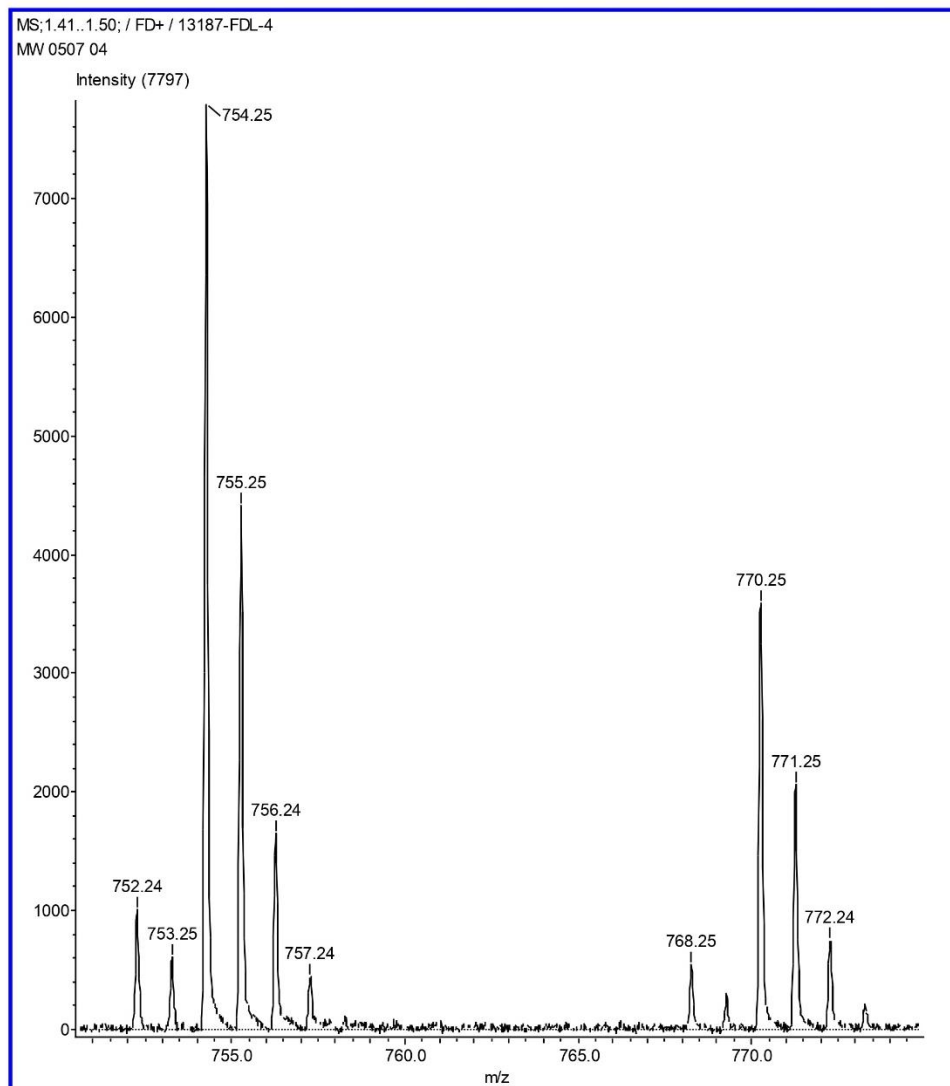

**Figure S16.** Low-resolution FD-MS & APCI-MS spectra of chemically oxidized, irradiated **Fc<sub>2</sub>An<sub>2</sub>SO** (range from m/z 750 to 775 shown).

## Spectra

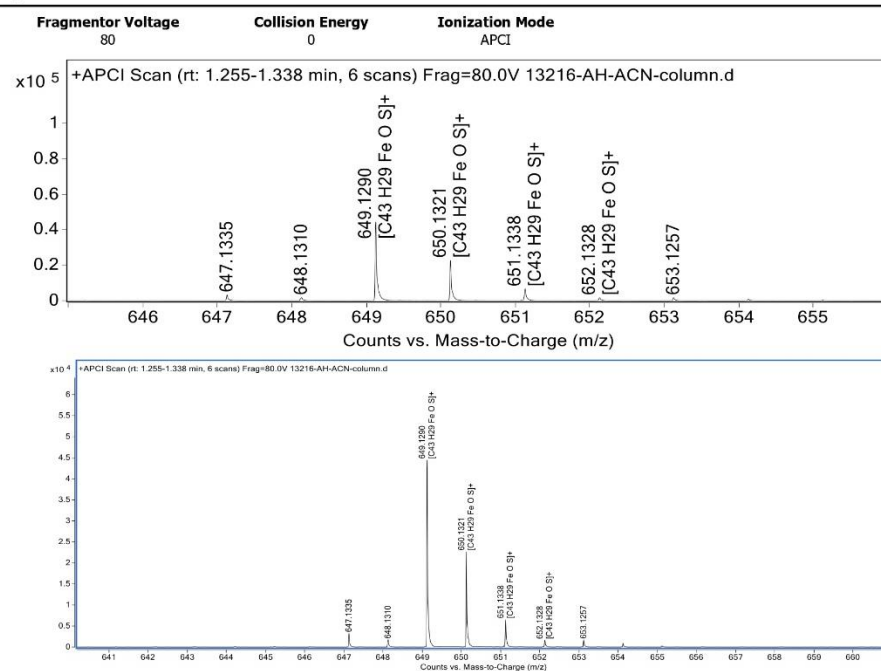

**Figure S17.** High-resolution APCI-MS spectra of chemically oxidized, irradiated  $\text{Fc}_2\text{An}_2\text{SO}$  (range from  $m/z = 640$  to  $656$  shown).

## Spectra

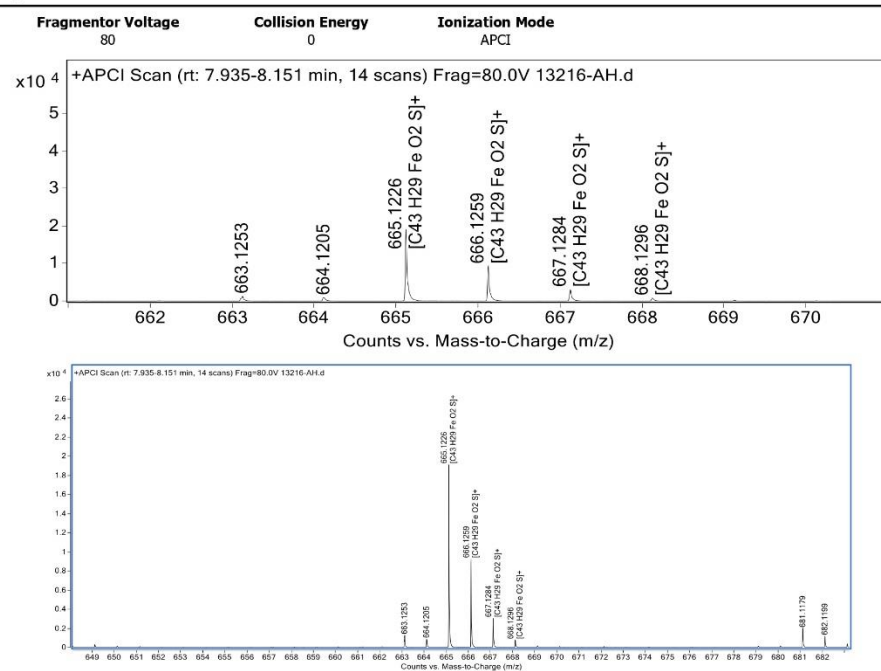

**Figure S18.** High-resolution APCI-MS spectra of chemically oxidized, irradiated  $\text{Fc}_2\text{An}_2\text{SO}$  (range from  $m/z = 661$  to  $671$  shown).

# Spectra

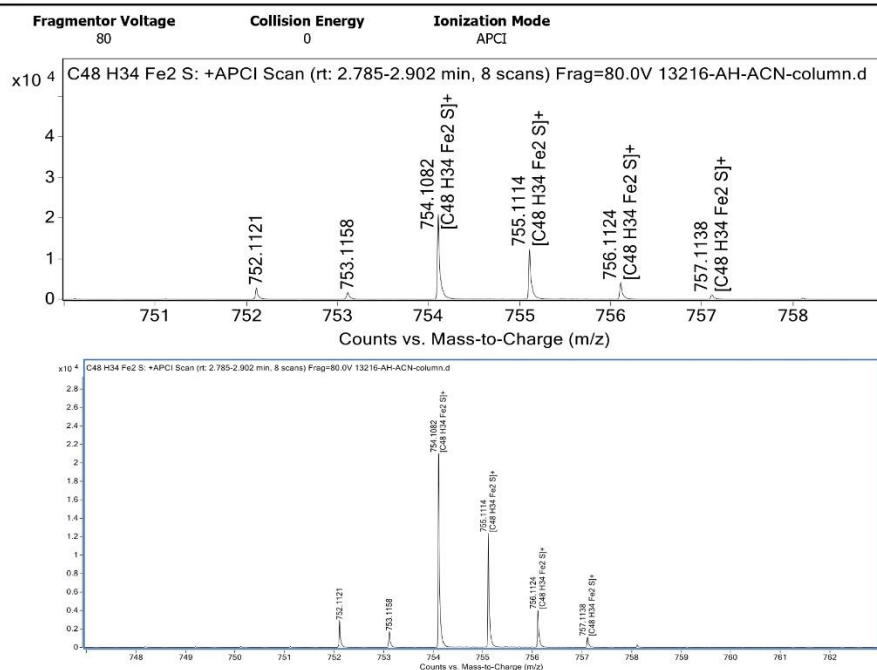

**Figure S19.** High-resolution APCI-MS spectra of chemically oxidized, irradiated **Fc<sub>2</sub>An<sub>2</sub>SO** (range from  $m/z = 750$  to  $759$  shown).

# Spectra

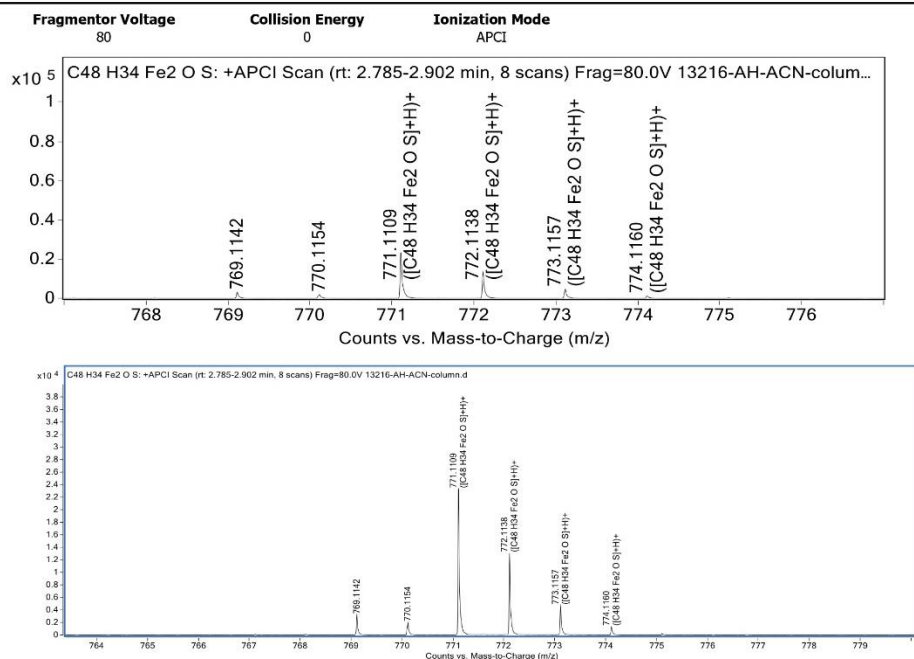

**Figure S20.** High-resolution APCI-MS spectra of chemically oxidized, irradiated **Fc<sub>2</sub>An<sub>2</sub>SO** (range from  $m/z = 767$  to  $777$  shown).

## Crystallography

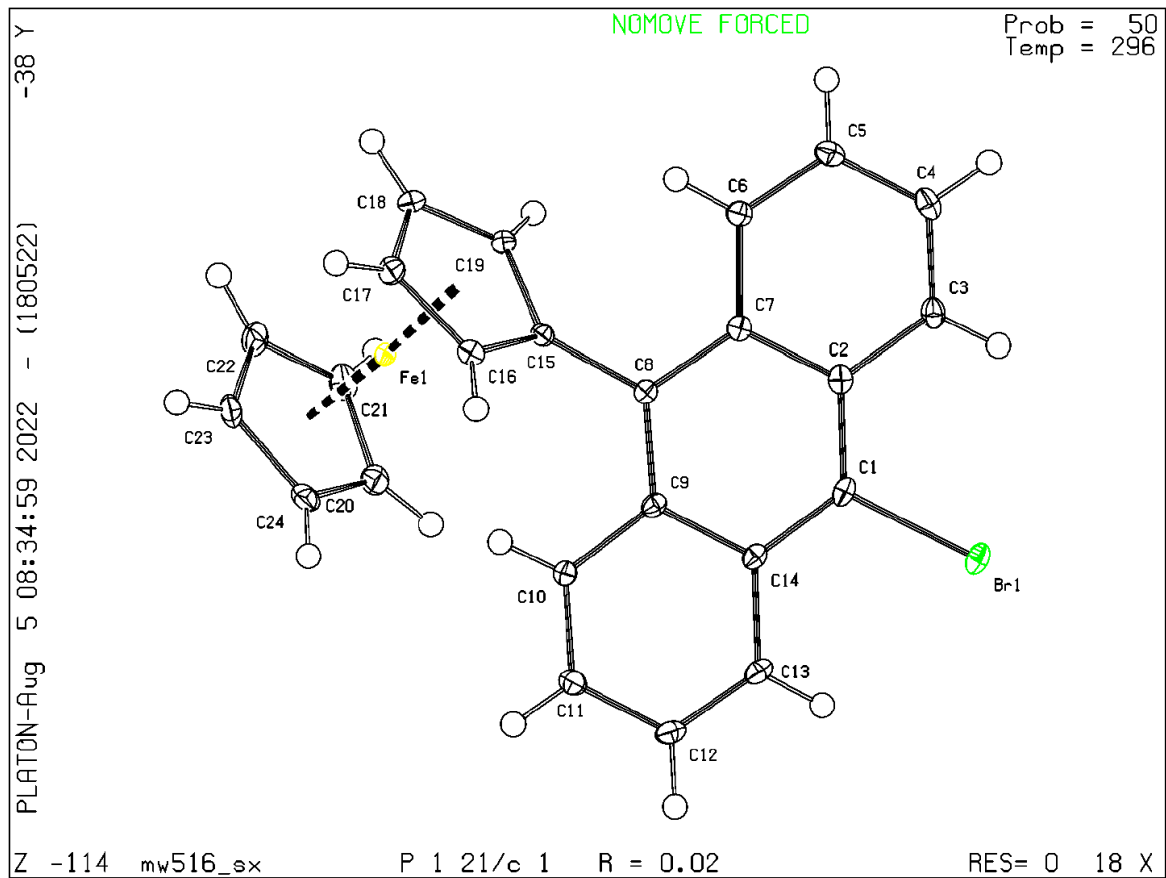

**Figure S21.** ORTEP of **FcAnBr**.

**Table S1.** Crystallographic data and structural refinement for **FcAnBr**.

|                                          |                                                                |
|------------------------------------------|----------------------------------------------------------------|
| Empirical formula                        | C <sub>24</sub> H <sub>17</sub> FeBr                           |
| Molecular Weight, g/mol                  | 441.13                                                         |
| Temperature, K                           | 296.15                                                         |
| Crystal system                           | monoclinic                                                     |
| Space group                              | P21/c                                                          |
| a, Å                                     | 10.024(2)                                                      |
| b, Å                                     | 14.043(3)                                                      |
| c, Å                                     | 12.112(2)                                                      |
| $\alpha$ , °                             | 90                                                             |
| $\beta$ , °                              | 97.624(6)                                                      |
| $\gamma$ , °                             | 90                                                             |
| Volume, Å <sup>3</sup>                   | 1689.8(6)                                                      |
| Z                                        | 4                                                              |
| $\rho_{\text{calc}}$ , cm <sup>3</sup>   | 1.734                                                          |
| $\mu$ , mm <sup>-1</sup>                 | 3.261                                                          |
| F(000)                                   | 888.0                                                          |
| Crystal size, mm <sup>3</sup>            | 0.44 × 0.07 × 0.02                                             |
| Radiation                                | MoK $\alpha$ , ( $\lambda$ = 0.71073)                          |
| 2 $\theta$ range for data collection, °  | 4.1 to 61.102                                                  |
| Index ranges                             | -14 ≤ h ≤ 14, -20 ≤ k ≤ 18, -17 ≤ l ≤ 17                       |
| Reflections collected                    | 47676                                                          |
| Independent reflections                  | 5169 [ $R_{\text{int}}$ = 0.0416, $R_{\text{sigma}}$ = 0.0224] |
| Data/restraints/parameters               | 5169/0/235                                                     |
| Goodness-of-fit on F <sup>2</sup>        | 1.038                                                          |
| Final R indexes [ $I \geq 2\sigma(I)$ ]  | $R_1$ = 0.0226, $wR_2$ = 0.0514                                |
| Final R indexes [all data]               | $R_1$ = 0.0292, $wR_2$ = 0.0538                                |
| Largest diff. peak/hole, Å <sup>-3</sup> | 0.50/-0.37                                                     |

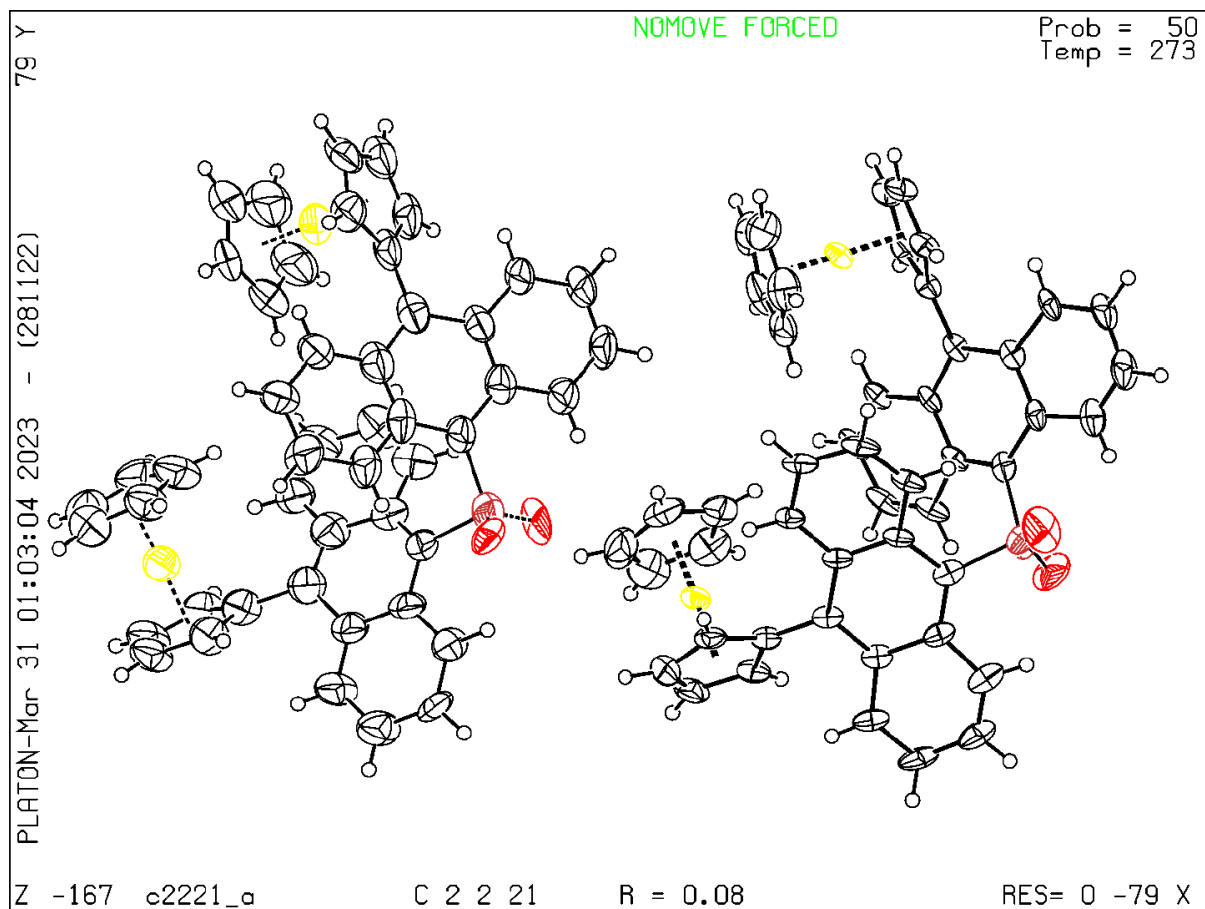

**Figure S22.** ORTEP of  $\text{Fc}_2\text{An}_2\text{SO}$ .

**Table S2.** Crystallographic data and structural refinement for **Fe<sub>2</sub>An<sub>2</sub>SO**

|                                          |                                                                |
|------------------------------------------|----------------------------------------------------------------|
| Empirical formula                        | C <sub>48</sub> H <sub>34</sub> Fe <sub>2</sub> OS             |
| Molecular Weight, g/mol                  | 770.51                                                         |
| Temperature, K                           | 273(2)                                                         |
| Crystal system                           | orthorhombic                                                   |
| Space group                              | C222 <sub>1</sub>                                              |
| a, Å                                     | 10.591(6)                                                      |
| b, Å                                     | 42.48(3)                                                       |
| c, Å                                     | 15.387(8)                                                      |
| $\alpha$ , °                             | 90                                                             |
| $\beta$ , °                              | 90                                                             |
| $\gamma$ , °                             | 90                                                             |
| Volume, Å <sup>3</sup>                   | 6923(7)                                                        |
| Z                                        | 8                                                              |
| $\rho_{\text{calc}}$ , cm <sup>3</sup>   | 1.479                                                          |
| $\mu$ , mm <sup>-1</sup>                 | 0.938                                                          |
| F(000)                                   | 3184.0                                                         |
| Crystal size, mm <sup>3</sup>            | 0.24 × 0.21 × 0.09                                             |
| Radiation                                | MoK $\alpha$ , ( $\lambda$ = 0.71073)                          |
| 2 $\theta$ range for data collection, °  | 1.918 to 48.274                                                |
| Index ranges                             | -10 ≤ h ≤ 12, -37 ≤ k ≤ 48, -17 ≤ l ≤ 17                       |
| Reflections collected                    | 18005                                                          |
| Independent reflections                  | 5531 [ $R_{\text{int}}$ = 0.0839, $R_{\text{sigma}}$ = 0.0814] |
| Data/restraints/parameters               | 5531/1477/632                                                  |
| Goodness-of-fit on F <sup>2</sup>        | 1.093                                                          |
| Final R indexes [ $I \geq 2\sigma(I)$ ]  | $R_1$ = 0.0776, $wR_2$ = 0.1778                                |
| Final R indexes [all data]               | $R_1$ = 0.0979, $wR_2$ = 0.1902                                |
| Largest diff. peak/hole, Å <sup>-3</sup> | 0.48/-0.50                                                     |

## Electrochemical Data

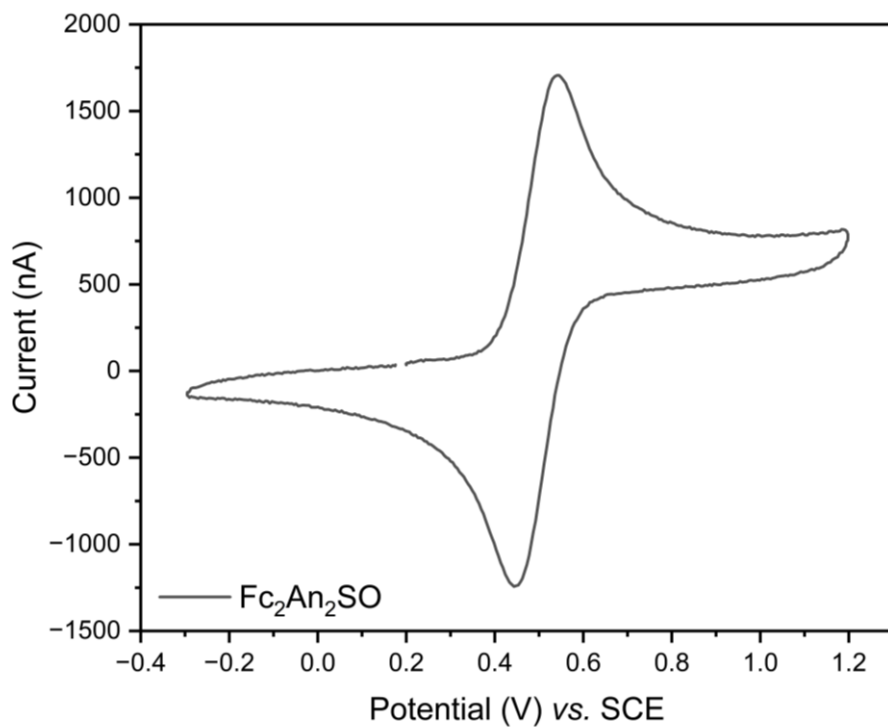

**Figure S23.** Cyclic voltammogram of  $\text{Fc}_2\text{An}_2\text{SO}$  in  $\text{CH}_2\text{Cl}_2$  (-0.4 V to 1.3 V) with  $\text{TBAPF}_6$  electrolyte under nitrogen.

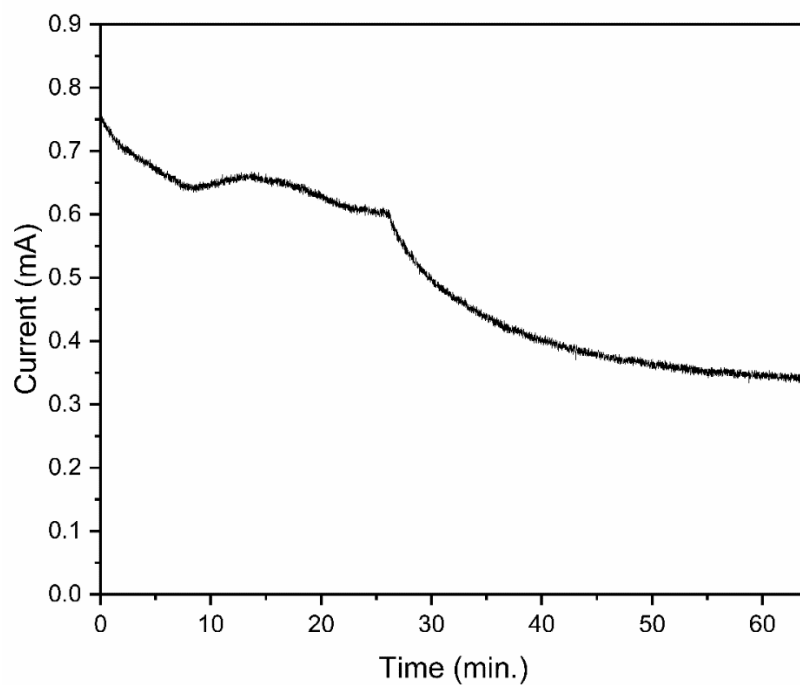

**Figure S24.** Current vs. time plot for bulk electrolysis of  $\text{Fc}_2\text{An}_2\text{SO}$ .

## Photochemical Data

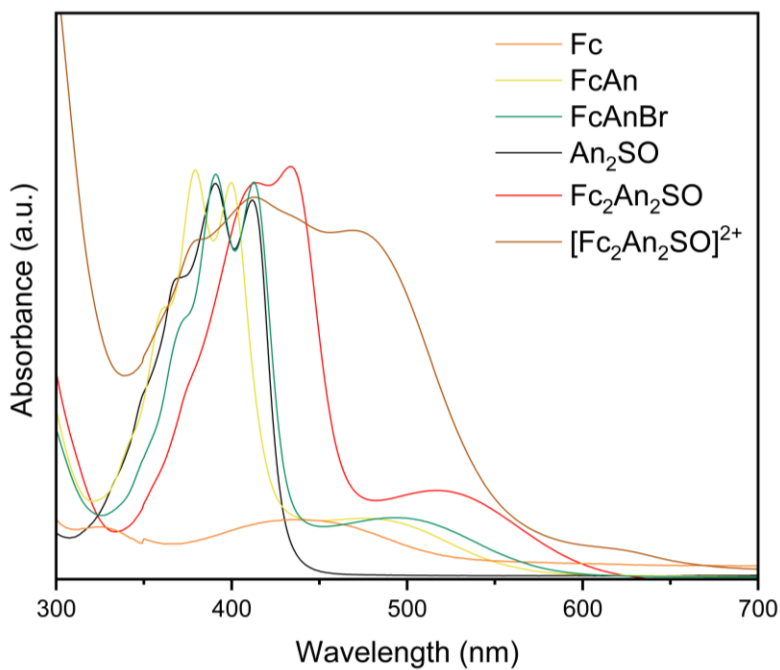

**Figure S25.** UV/Visible absorption spectra of ferrocene (**Fc**) (orange), ferrocenyl anthracene (**FcAn**) (yellow), 9-bromo-10-ferrocenylanthracene (**FcAnBr**) (green), **An<sub>2</sub>SO** (black), **Fc<sub>2</sub>An<sub>2</sub>SO** (red) and **[Fc<sub>2</sub>An<sub>2</sub>SO]<sup>2+</sup>** (brown).

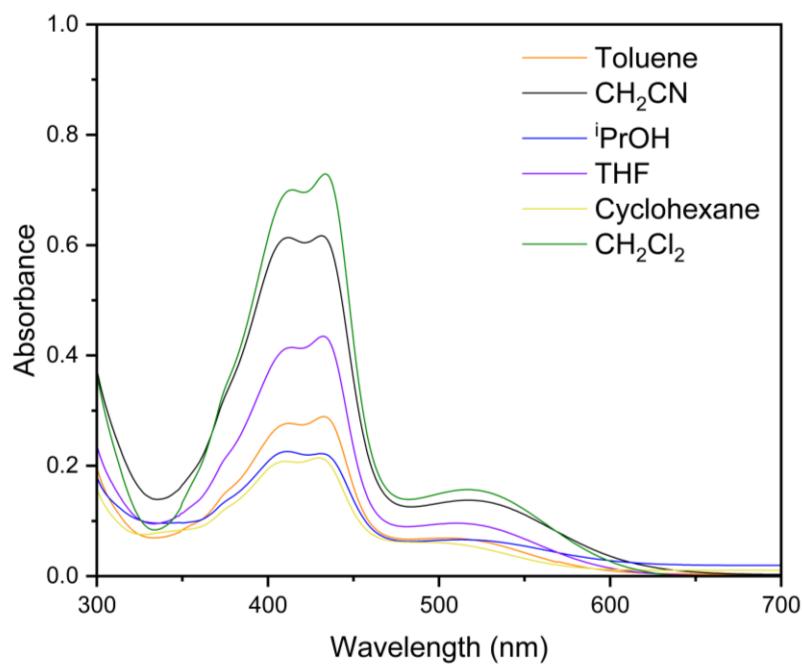

**Figure S26.** UV/Vis absorption spectra of **Fc<sub>2</sub>An<sub>2</sub>SO** in different solvents.

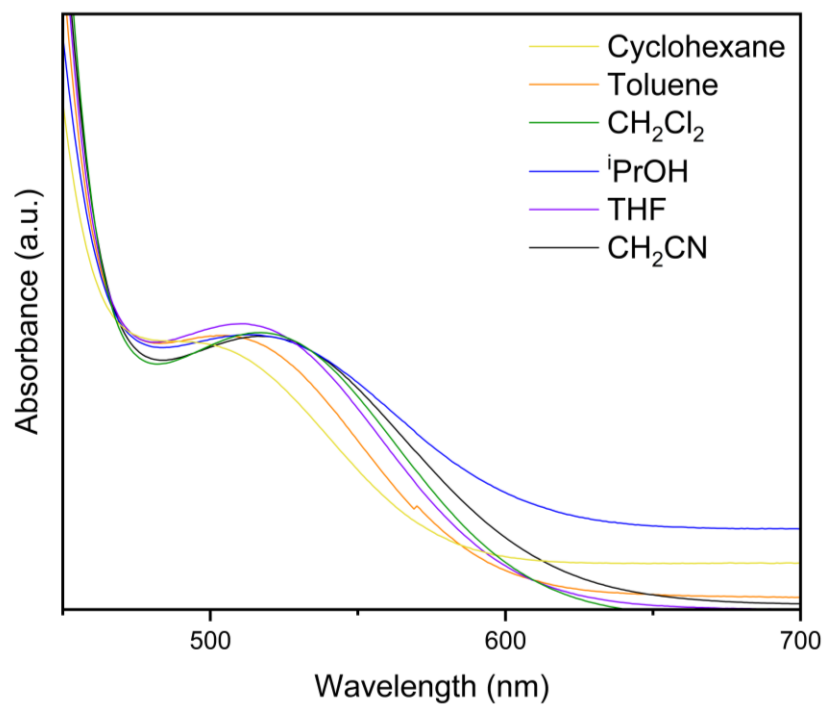

**Figure S27.** Normalized UV/Vis absorption of **Fc<sub>2</sub>An<sub>2</sub>SO** in different solvents (450 nm – 700 nm).

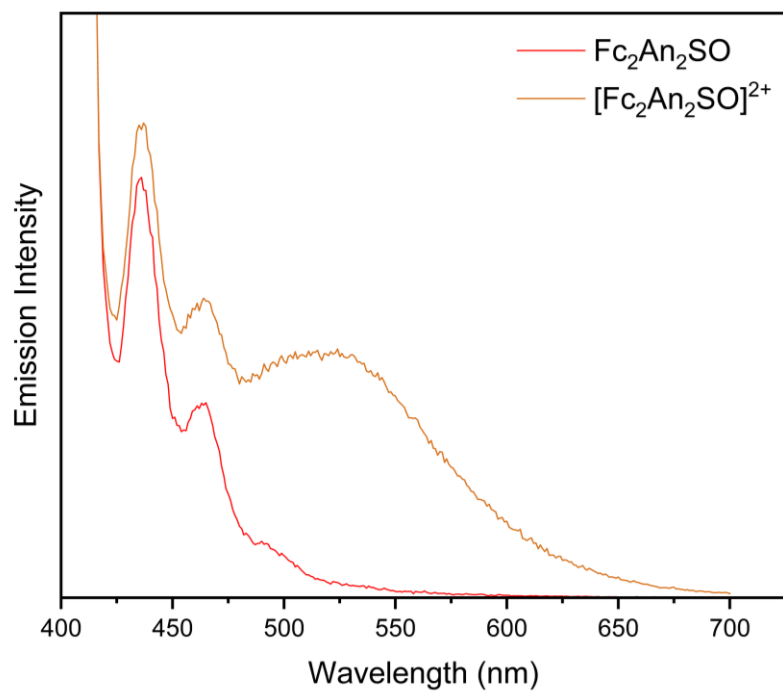

**Figure S28.** Emission spectra of **Fc<sub>2</sub>An<sub>2</sub>SO** (red) and **[Fc<sub>2</sub>An<sub>2</sub>SO]<sup>2+</sup>** (orange).

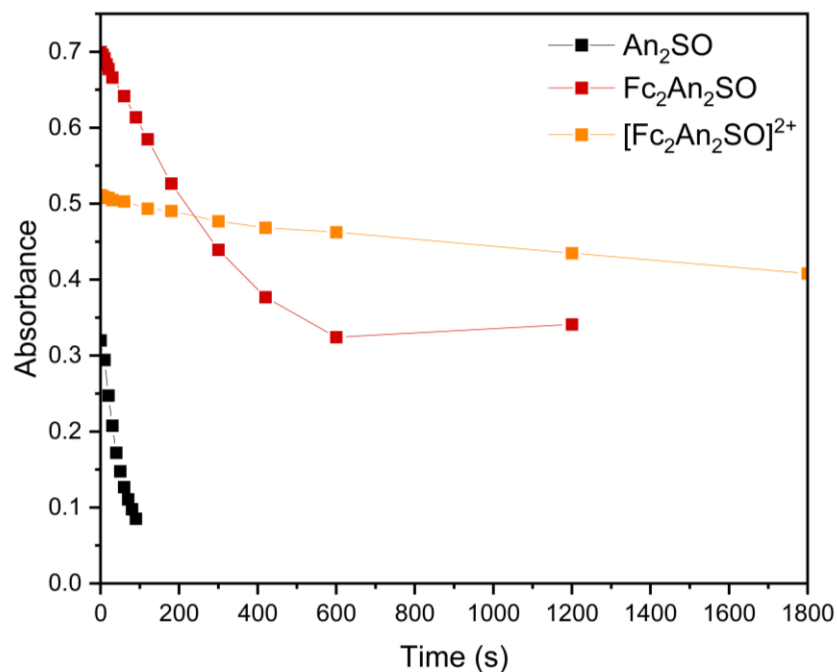

**Figure S29.** Photochemical rates of reaction of **An<sub>2</sub>SO** (black), **Fc<sub>2</sub>An<sub>2</sub>SO** (red) and **[Fc<sub>2</sub>An<sub>2</sub>SO]<sup>2+</sup>** (orange). Wavelength of irradiation source (excitation) = 254 nm. Wavelength at which absorption was compared across samples = 413 nm. Time of irradiation; **An<sub>2</sub>SO** = 1.5 min, **Fc<sub>2</sub>An<sub>2</sub>SO** = 20 min, **[Fc<sub>2</sub>An<sub>2</sub>SO]<sup>2+</sup>** = 30 min.

## References

1. O. V. Dolomanov, L. J. Bourhis, R. J. Gildea, J. A. K. Howard, H. Puschmann, *J. Appl. Crystallogr.*, 2009, **42**, 339–341.
2. W. F. Polik, J. R. Schmidt, J. R. Wiley *Interdiscip. Rev. Comput. Mol. Sci.*, 2022, **12**.
3. I. R. Butler, L. J. Hobson, S. J. Coles, M. B. Hursthouse, K. M. Abdul Malik, *J. Organomet. Chem.*, 1997, **540**, 27 – 40.
4. Nikitin, K.; Müller-Bunz, H.; Ortin, Y.; Muldoon, J.; McGlinchey, M. J. *J. Am. Chem. Soc.*, 2010, **132**, 17617–17622.
